# Supplementary material for: TOMM40 Genetic Variants Cause Neuroinflammation in Alzheimer’s Disease
Source: MDPI journal article supplement (doi:10.3390/ijms24044085), 2023-02-17
Supplement: s1 [file s1]

**Supplementary Table S1. List of primary and secondary antibodies used in experiments.**

| Antibody           | Antigen                                   | Host species | Type       | Catalog Number | Source                    |
|--------------------|-------------------------------------------|--------------|------------|----------------|---------------------------|
| Primary antibody   | Iba-1                                     | Rabbit       | Polyclonal | 10904-1-AP     | Proteintech               |
|                    | COXIV                                     | Rabbit       | Monoclonal | #4850          | Cell signaling Technology |
|                    | $\beta$ -actin                            | Mouse        | Monoclonal | MAB1501        | Merck                     |
|                    | IKK- $\beta$                              | Rabbit       | Monoclonal | #8943          | Cell signaling Technology |
|                    | Phospho-IKK $\alpha/\beta$ (Ser176/180)   | Rabbit       | Monoclonal | #2697          | Cell signaling Technology |
|                    | FLAG                                      | Mouse        | Monoclonal | F3165          | Sigma                     |
|                    | NF- $\kappa$ B p65                        | Rabbit       | Monoclonal | #8242          | Cell signaling Technology |
|                    | Phospho-NF- $\kappa$ B p65 (Ser536)       | Rabbit       | Monoclonal | #3033          | Cell signaling Technology |
|                    | NLRP3                                     | Rabbit       | Monoclonal | #15101         | Cell signaling Technology |
|                    | ASC/TMS1                                  | Rabbit       | Polyclonal | A1170          | ABclonal                  |
|                    | Cleaved Caspase-1                         | Rabbit       | Monoclonal | #89332         | Cell signaling Technology |
| Secondary antibody | Goat anti-rabbit IgG, HRP-linked Antibody |              |            | #7074          | Cell signaling Technology |
|                    | Horse anti-mouse IgG, HRP-linked Antibody |              |            | #7076          | Cell signaling Technology |

(A)

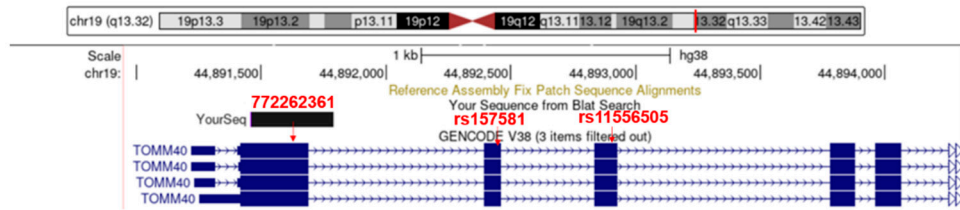

(B)

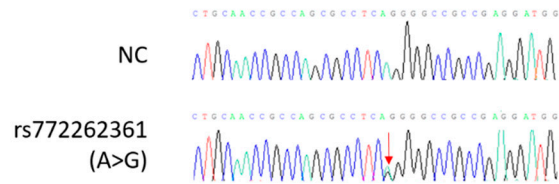

**Supplementary Figure S1. TOMM40 SNPs in genomic DNA of AD patients.** (A) Physical loci of the associated SNPs within the TOMM40-APOE region. (B) Sanger sequencing confirmed the sequence of rs772262361 from AD patient.
